# Supplementary material for: Annotating and Detecting Topics in Social Media Forum and Modelling the Annotation to Derive Directions-A Case Study
Source: Research Square preprint supplement (doi:10.21203/rs.3.rs-132773/v1), 2020-12-23
Supplement: Supplementary file 1 [file 85157d8244b19befc13190a9.docx]

# Appendix 1

## Forum names and sample posts with given label

| Forum Name | Label | Concept | Sample-Post |
| --- | --- | --- | --- |
| F7-  Moving beyond Cancer | DXS | Diagnosis stories | i had an ultrasound guided one - it's very interesting.  you can watch what they do on the ultrasound.  i saw the needle go into my breast and pull out cancer tissue.  (the cancer was very obvious in my case.) they numb you so it doesn't hurt.it doesn't take very long either. |
| F27-  Young with Breast Cancer | SUP.REQ | Requesting information support | tell me about it i'm so confused and i don't want to ask my dr it will just confuse me more. dcis was not even mentioned to me at the beginning and yet it's there somehow it's there the scans don't show everything so we have found out. i just want my plan of action and my ct so i can get on with it. feeling very confused and fed up of trying to understanding and i get the impression they don't even understand it very well. |
| F27-  Young with Breast Cancer | SUP.OFF.IS | Support offering (information support) | dcis is often found with idc. they are not treating your dcis just your idc. it cannot respond to systemic treatments such as chemo so the size of your dcis would not change from having chemo. sometimes after a biopsy or lumpectomy/mastectomy they find more (or less) than they originally thought was there initially. i think a second opinion is a good idea in either case. wishing you the best whatever happens! |
|  |  |  |  |
| F113-  Employment and Insurance | FIN.INS | Financial trouble with insurance | my insurance company is wonderful to work with but the 3rd party billing companies are difficult. i think i learned to never make my co-pay as they never seem to credit it to the right account. i paid $1400 on my daily radiation co-pay and still 'fight' with the billing company to find that money and credit accordingly |
| F131-  Information and resources for new patients, and new members | CLIN | Clinicians’ information | “dr. jamie escallon is a great breast surgeon out of womens college and princess Margaret”. |
| F149-  BCO Free-Cycle: Give or trade items related to breast cancer | ADE.ALO | Drug side effects | chemo side effects vary but for many women taxol is bearable. it gave me mild diarrhea which i managed with imodium. i lost weight on taxol because it altered the taste of food for me. taxol isn't associated with dramatic hair loss though i cannot attest to that because i lost all my hair from adriamycin/cytoxan. good luck! |
| F23-  Biographies and Inspiring Stories | TXS | Treatment stories | hi everyone. just noticed this thread and i'm triple + 29 years old. just finished up with chemo (ac + taxol). starting radiation in a little more than a week and will continue herceptin and perjeta for a year. i did not receive any treatment before surgery. i also plan on doing ovarian suppression plus an ai. from what i understand there's not a huge difference in tamoxifen vs ai in her2+ patients. just going to try the ai and see how i fare on it. |
| F34-  Get Togethers | CTXF.FAM.KIDS | Stories about and issues with the user's kids | my 13 y.o. would probably enjoy having the run of the mall while i went to lunch. |
| F55-  Canadian Breast Cancer Survivors | CTXF.LOC.CAN | Geolocation - Canada | i'm in british columbia but i used to live in ottawa |
| F71-  ILC (Invasive Lobular Carcinoma) | ADE.SOR | Coping with sores as ADE | i was red swollen and very sore.  the red actualu extended up from the incision about 2 inches i thought i had an infection....i was placed on a very strong antibiotic for 10 days. |
| F71-  ILC (Invasive Lobular Carcinoma) | DXS | Diagnosis stories | hi I am at stage iiia diagnosed june 1 2009.  had lumpectomy in july.  tumor was 2cm × 2cm × x2.5cm.  7 out of 16 cases of lymph node involvement.  has a small ilc tumor in other breast with no lymph node involvement.  had scant traces of cancer cells left in my right chest wall (no clean margins).” |
| F98-  African Americans with Breast Cancer | DXS.RACE | Racial and ethnic issues in diagnosis | wow!ilinda that is scary! so none of the other common symptoms like swelling warmth bruise itching orange d'peu or inverted or flattened nipple????? that is so scary. i would of never thought just the red dots would of been cancer!this is why i am asking specifically african american women their symptoms because it seems our symptoms and appearance obviously may be different than caucasian women. |
